# Supplementary material
Source: Springer Nature journal article supplement (https://www.springermedizin.de/resource/supplementary/12889_2014_7172_MOESM2_ESM.pdf/9496910)
Supplement: MOESM2 [file 9496910]

### **Explaining current lifestyle**

Current lifestyle was logical for participants given available time and energy, habits, social influences and physical condition

Specifically for low SES:

- In addition explained by financial considerations

### **Triggering lifestyle change**

Lifestyle change could be prompted by feedback from participants' body

Specifically for low SES:

- Rather induced by health complaints than for preventive purposes

### **Supporting lifestyle change**

Support for lifestyle change should include individually tailored advice and should take into account the advantages of making lifestyle changes together with others

Specifically for low SES:

- Preferably with persons of the same age, gender or physical condition

### **Opportunities to make a lifestyle intervention more appealing and accessible**

Specifically for low SES:

- Take possible cost concerns into account
- Visualise their own physical condition (like being overweight or having high cholesterol) to raise awareness about their health status and consequently to trigger interest in lifestyle change
- Harness the supportive effect of (peer) groups
